# Supplementary material for: Going beyond the barriers of aza-Michael reactions: controlling the selectivity of acrylates towards primary amino-PDMS
Source: Royal Society of Chemistry journal article supplement (doi:10.1039/c6py01802e), 2016-12-08
Supplement: c6py01802e1.pdf [file c6py01802e1.pdf]

Supporting information for

**Going beyond the barriers of Aza-Michael reaction: controlling the selectivity of acrylates towards primary amino-PDMS**

By Aymeric Genest, Sandra Binauld, Emmanuel Pouget, François Ganachaud, Etienne Fleury and Daniel Portinha\*

**Table S1:** Influence of the Michael acceptor on the aza-Michael addition with  $\alpha,\omega$ -amino-PDMS (NH40D). Room temperature, bulk,  $r \sim 0.5$

| Michael donor | Michael acceptor <sup>(a)</sup> | $r$  | time (h) | Conv. (%) | Composition (mol-%) |                 |                                |
|---------------|---------------------------------|------|----------|-----------|---------------------|-----------------|--------------------------------|
|               |                                 |      |          |           | MA <sup>b</sup>     | DA <sup>c</sup> | R-NH <sub>2</sub> <sup>d</sup> |
| NH40D         | BA                              | 0.53 | 25       | 80        | 73                  | 3.5             | 23.5                           |
|               |                                 |      | 1080     | 100       | 87                  | 7.0             | 6.0                            |
|               | AN                              | 0.50 | 1        | 6         | 6                   | 0               | 94                             |
|               |                                 |      | 4        | 20        | 20                  | 0               | 80                             |
|               |                                 |      | 8        | 34        | 34                  | 0               | 66                             |
|               | MeA                             | 0.50 | 1        | 15        | 15                  | 0               | 85                             |
|               |                                 |      | 4        | 39        | 38                  | 1               | 61                             |
|               |                                 |      | 7        | 52        | 50                  | 2               | 48                             |
|               | tBA                             | 0.5  | 1        | 9         | 9                   | 0               | 91                             |
|               |                                 |      | 264      | 91        | 87                  | 4               | 9                              |

(a) BA: butyl acrylate; AN: acrylonitrile; MeA: methyl acrylate; tBA: t-butyl acrylate, (b) Mono-adduct, (c) Di-adduct, (d) Primary amine groups

**Table S2:** Influence of the IPOH content on the kinetics and amine composition, with NH40D and BA as reactants (T = 25°C).

| Entry | <i>r</i> | Solvent (mol%) | Time (h) | Conv. (%) | Composition (mol-%)    |                        |                                      |
|-------|----------|----------------|----------|-----------|------------------------|------------------------|--------------------------------------|
|       |          |                |          |           | <i>MA</i> <sup>a</sup> | <i>DA</i> <sup>b</sup> | <i>R-NH<sub>2</sub></i> <sup>c</sup> |
| S1    | 0.51     | 14             | 1        | 31        | 31                     | 0                      | 69                                   |
|       |          |                | 4        | 61        | 59                     | 2                      | 39                                   |
|       |          |                | 8        | 77        | 71                     | 3                      | 26                                   |
| S2    | 0.53     | 36             | 5        | 87        | 82                     | 2.5                    | 16                                   |
| S3    | 0.50     | 40             | 1        | 57        | 55                     | 1                      | 44                                   |
|       |          |                | 4        | 83        | 79                     | 2                      | 19                                   |
|       |          |                | 8        | 91        | 85                     | 3                      | 12                                   |
| S4    | 0.51     | 57             | 1        | 70        | 68                     | 1                      | 30                                   |
|       |          |                | 4        | 89        | 85                     | 2                      | 13                                   |
|       |          |                | 8        | 94        | 90                     | 2                      | 8                                    |
| S5    | 0.51     | 77             | 1        | 74        | 72                     | 1                      | 27                                   |
|       |          |                | 4        | 91        | 89                     | 1                      | 9                                    |
|       |          |                | 8        | 94        | 92                     | 1                      | 6                                    |
| S6    | 0.51     | 85             | 2        | 85.5      | 84                     | 1                      | 15                                   |
|       |          |                | 48       | 99.5      | 96                     | 1.5                    | 2                                    |
| S7    | 0.51     | 93             | 1        | 69        | 69                     | 0                      | 31                                   |
|       |          |                | 4        | 90        | 88                     | 1                      | 11                                   |
|       |          |                | 8        | 94        | 92                     | 1                      | 6                                    |
| S8    | 0.53     | 98             | 7        | 85.5      | 88                     | 0                      | 11.5                                 |
|       |          |                | 28       | 95        | 97                     | 0                      | 2.5                                  |
|       |          |                | 48       | 96.5      | 97                     | 1                      | 2                                    |

(a) Mono-adduct, (b) Di-adduct, (c) Primary amine groups

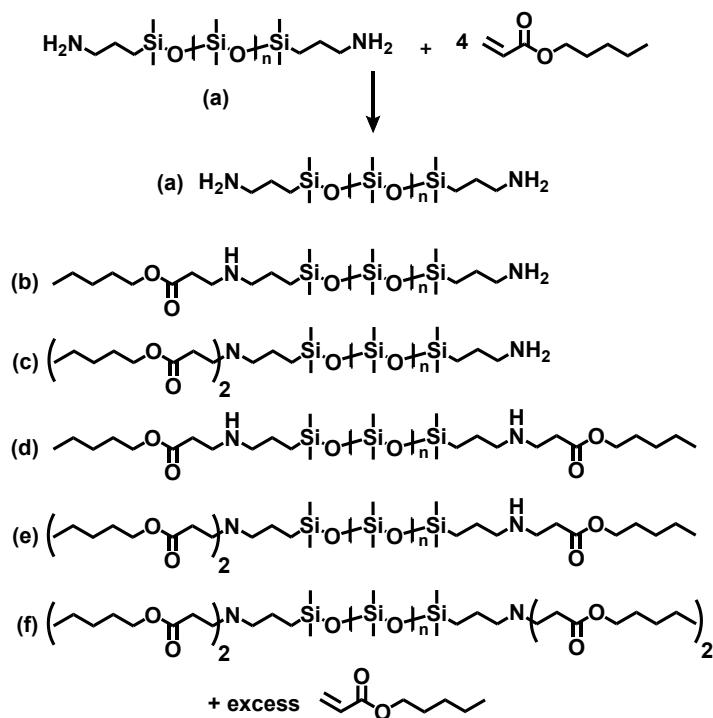

**Figure S1:** Possible structures obtained in the aza-Michael reaction of a bis(aminopropyl)-terminated PDMS with butyl acrylate.

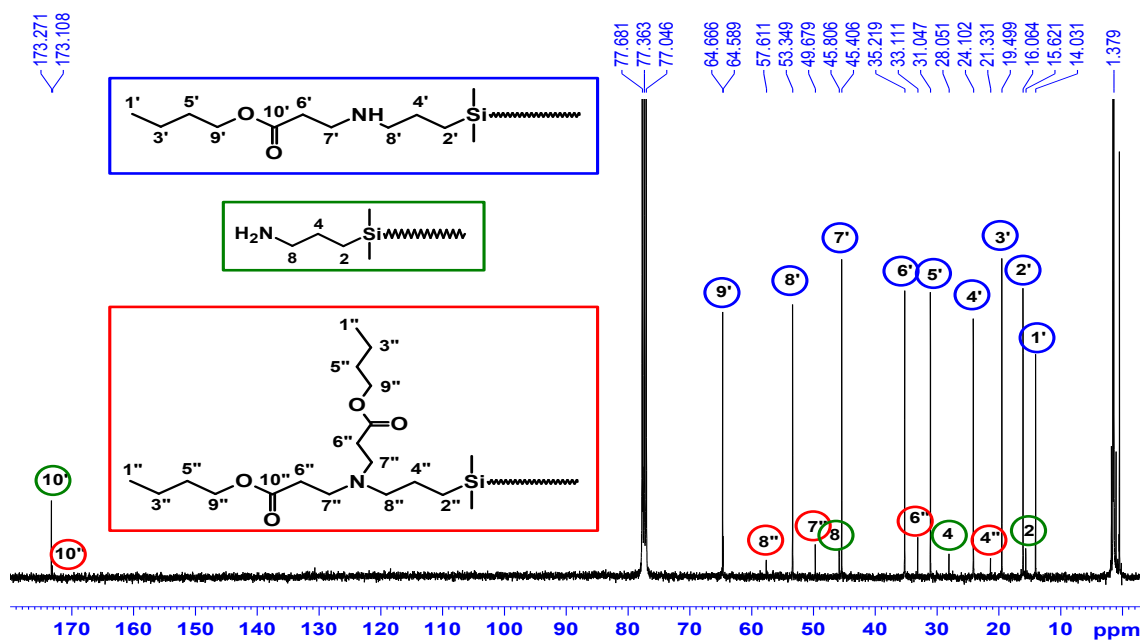

**Figure S2:**  $^{13}\text{C}$  NMR analysis of the mixture of amines after removal of residual butyl acrylate (entry s1, Table s1 (t = 25h)).

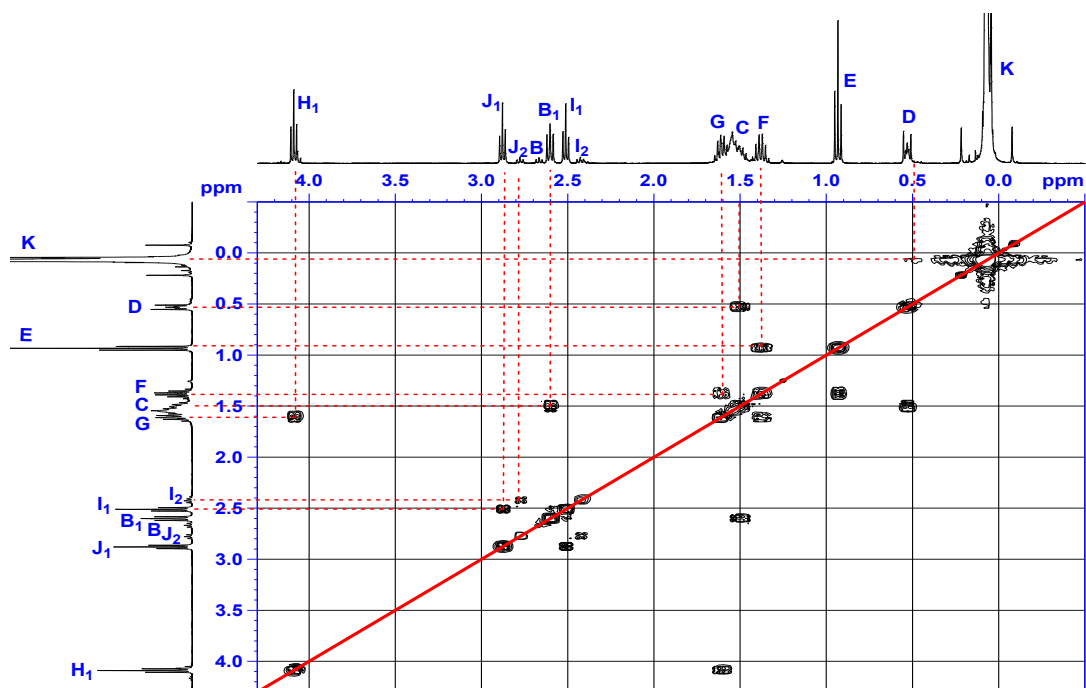

**Figure S3** : COSY analysis ( $J_{HH}$ ) of the mixture of amines after removal of residual butyl acrylate (entry s1, Table s1 (t = 25h))

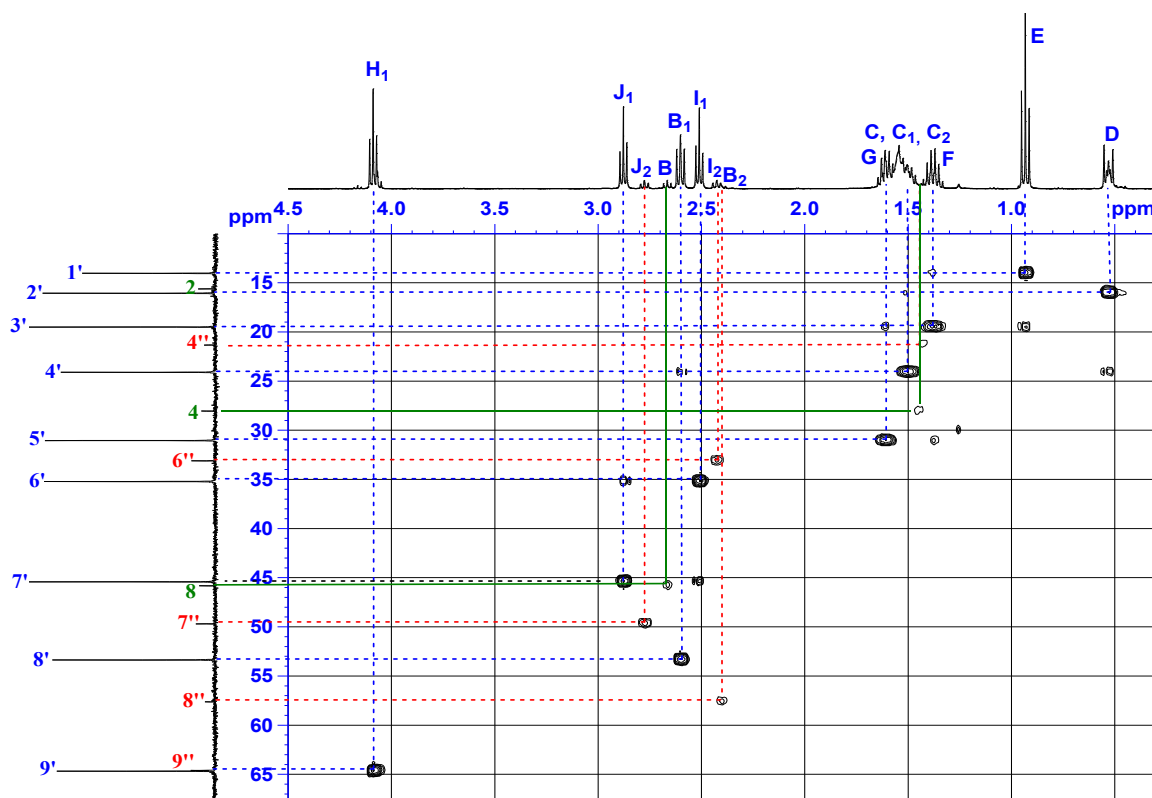

**Figure S4**: HSQC analysis ( $J_{CH}$ ) of the mixture of amines after removal of residual butyl acrylate (entry s1, Table s1 (t = 25h))

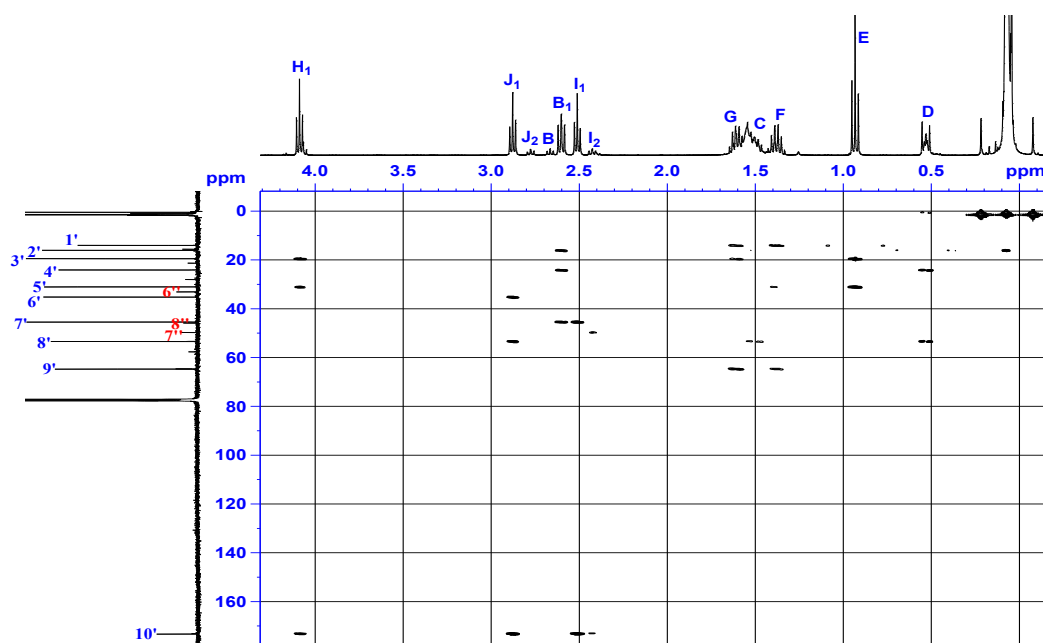

**Figure S5:** HMBC analysis ( $^2J_{CH}$ ,  $^3J_{CH}$ ) of the mixture of amines after removal of residual butyl acrylate (entry s1, Table s1 (t = 25h)).

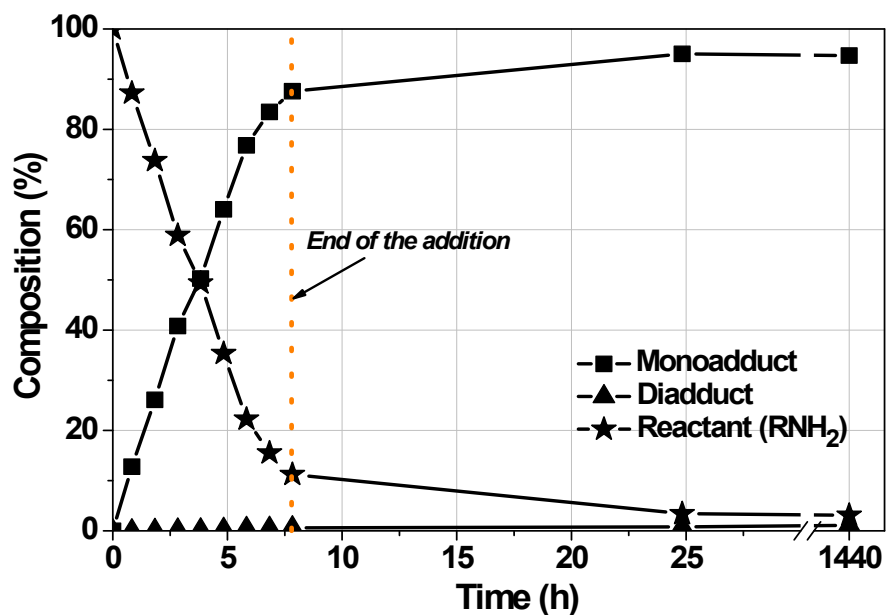

**Figure S6:** Composition change in amine for a starve-fed addition of a butylacrylate/isopropanol solution to an aminopropyl-terminated PDMS ( $r=0.5$ ,  $25^\circ\text{C}$ ). Final content in IPA: 85mol%
